# Supplementary material for: Intermittent Hypoxia Promotes TAM-Induced Glycolysis in Laryngeal Cancer Cells via Regulation of HK1 Expression through Activation of ZBTB10
Source: MDPI journal article supplement (doi:10.3390/ijms241914808), 2023-09-30
Supplement: s1 [file s1]

| TF     | Pattern name     | Source    | Sequence name               | Start | Stop | Strand | Score   | P value  | Q value | Matched motif    |
|--------|------------------|-----------|-----------------------------|-------|------|--------|---------|----------|---------|------------------|
| ZBTB10 | m-dataset-3775-1 | hTFtarget | hg38_ncbiRefSeq_NM_000188.3 | 1252  | 1267 | +      | 10.0921 | 8.52e-05 | 0.168   | GAGGGAGAGCCACCGG |
| ZBTB10 | m-dataset-3775-1 | hTFtarget | hg38_ncbiRefSeq_NM_000188.3 | 916   | 931  | -      | 9.96053 | 9.14e-05 | 0.168   | TAGACAGGTAAGGAAA |
