# Supplementary figures and images for: Intermittent Hypoxia Promotes TAM-Induced Glycolysis in Laryngeal Cancer Cells via Regulation of HK1 Expression through Activation of ZBTB10
Source: MDPI journal article supplement (doi:10.3390/ijms241914808), 2023-09-30

A

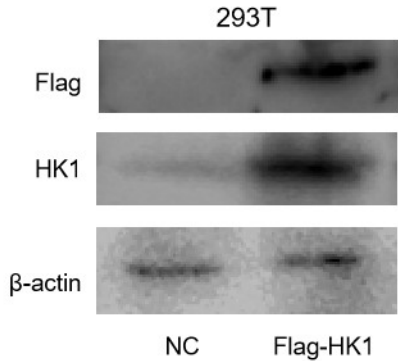

B

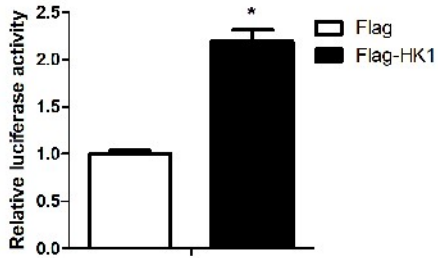

Supplement: s1 [file s1]
